# Supplementary material for: Hydroxyapatite Particles from Simulated Body Fluids with Different pH and Their Effects on Mesenchymal Stem Cells
Source: MDPI journal article supplement (doi:10.3390/nano11102517), 2021-09-27
Supplement: s1 [file s1]

# Hydroxyapatite Particles from Simulated Body Fluids with Different pH and Their Effects on Mesenchymal Stem Cells

Hiroki Miyajima <sup>1</sup>, Hiroki Touji <sup>2</sup> and Kazutoshi Iijima <sup>1,\*</sup>

<sup>1</sup> Faculty of Engineering, Yokohama National University, 79-5 Tokiwadai, Hodogaya-ku, Yokohama 240-8501, Japan; miyajima-hiroki-dt@ynu.ac.jp

<sup>2</sup> Graduate School of Engineering Science, Yokohama National University, 79-5 Tokiwadai, Hodogaya-ku, Yokohama 240-8501, Japan; touji-hiroki-bh@ynu.jp

\* Correspondence: iijima-kazutoshi-mh@ynu.ac.jp; Tel.: +81-45-339-3997

## 1. Characterization of precipitates from 1.5SBFs

Surface of micro-sized particles obtained from 1.5SBF at pH 7.4 were observed by transmission electron microscopy (TEM) (Figure S1). Energy dispersive X-ray (EDX) spectra of precipitates were obtained using Esprit 1.9 (Bruker Nano GmbH, Berlin, Germany) with scanning electron microscopy (SEM) (SU8010) (Figure S2) and JED-2300T (JEOL Ltd., Tokyo, Japan) equipped with TEM (JEM-2100F) (Figure S3). Ca/P ratios were calculated from the detected results of peaks.

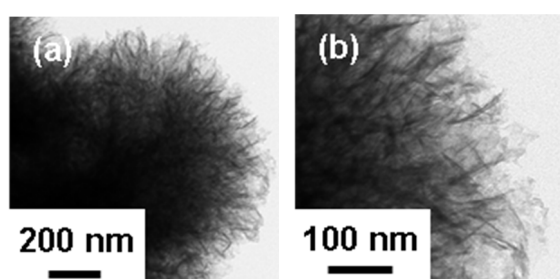

**Figure S1.** TEM images of the precipitates from 1.5SBF at pH 7.4. Scale bar: 200 nm (a), and 100 nm (b).

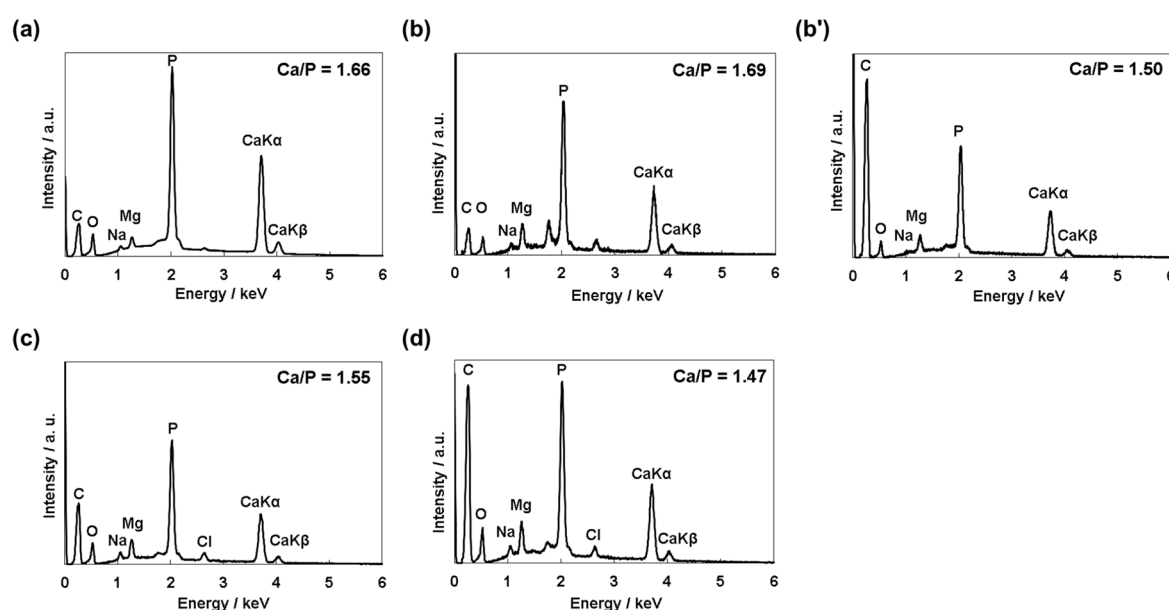

**Figure S2.** SEM-EDX profiles of precipitates obtained from 1.5SBF at pH 7.4 (a), pH 7.7 (micro-sized particles, (b), nano-sized particles, (b'), pH 8.0 (c), and pH 8.4 (d).

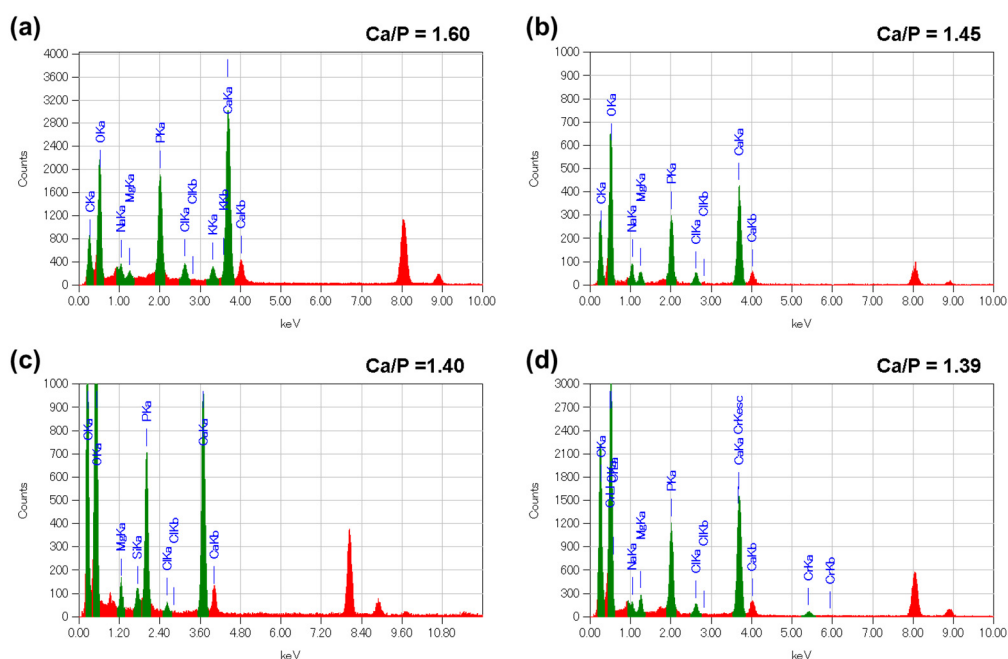

**Figure S3.** TEM-EDX spectra of precipitates obtained from 1.5SBF at pH 7.4 (a), pH 7.7 (nano-sized particles, (b), pH 8.0 (c), and pH 8.4 (d).

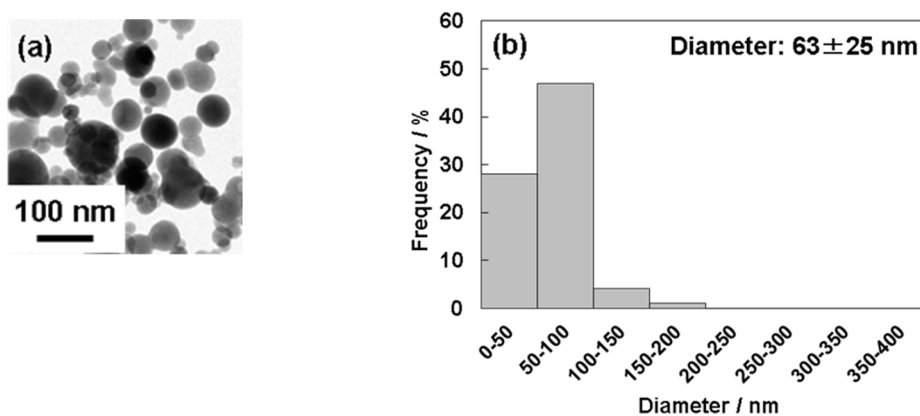

**Figure S4.** (a) TEM images of synthetic HAp particles. (b) Particles size distribution of chemically synthesized HAp particles. Diameters of particles were measured from TEM images.

**Table S1.** Calcium ion concentration measured by ICP-AES and estimates from yield in each pH of 1.5SBF after 24-h incubation.

| pH  | Measured [Ca <sup>2+</sup> ]<br>from ICP / mg L <sup>-1</sup> | Estimated [Ca <sup>2+</sup> ]<br>from yield / mg L <sup>-1</sup> |
|-----|---------------------------------------------------------------|------------------------------------------------------------------|
| 7.4 | 43.2                                                          | 51.2                                                             |
| 7.7 | 21.5                                                          | 28.4                                                             |
| 8.0 | 45.0                                                          | 34.7                                                             |
| 8.4 | 68.2                                                          | 75.4                                                             |
